# Supplementary material for: Bacteroides vulgatus attenuates experimental mice colitis through modulating gut microbiota and immune responses
Source: PubMed Central journal article supplement (PMC9750758; doi:10.3389/fimmu.2022.1036196), 2022-11-30
Supplement: DataSheet_1.pdf [file DataSheet_1.pdf]

***Bacteroides vulgatus* attenuates experimental mice colitis through modulating gut microbiota and immune responses**

Liyun Liu<sup>1,3†</sup>, Mingchao Xu<sup>1,2†</sup>, Ruiting Lan<sup>4†</sup>, Dalong Hu<sup>4</sup>, Xianping Li<sup>1</sup>, Lei Qiao<sup>1</sup>, Suping Zhang<sup>1,2</sup>, Xiaoying Lin<sup>1,2</sup>, Jing Yang<sup>1,3</sup>, Zhihong Ren<sup>1,3\*</sup> and Jianguo Xu<sup>1,2,3,5\*</sup>

<sup>1</sup>State Key Laboratory of Infectious Disease Prevention and Control, National Institute for Communicable Disease Control and Prevention, Chinese Center for Disease Control and Prevention, Beijing 102206, China.

<sup>2</sup>Department of Epidemiology, Center for Global Health, School of Public Health, Nanjing Medical University, Nanjing 211166, Jiangsu Province, China.

<sup>3</sup>Research Units of Discovery of Unknown Bacteria and Function, Chinese Academy of Medical Sciences, Beijing 102206, PR China.

<sup>4</sup>School of Biotechnology and Biomolecular Sciences, University of New South Wales, Sydney, New South Wales, Australia.

<sup>5</sup>Institute of Public Health, Nankai University, Tianjin, PR China

\* Corresponding author

E-mail addresses: xujianguo@icdc.cn (J. Xu), renzhihong@icdc.cn (Z. Ren).

†These authors contributed equally to this work

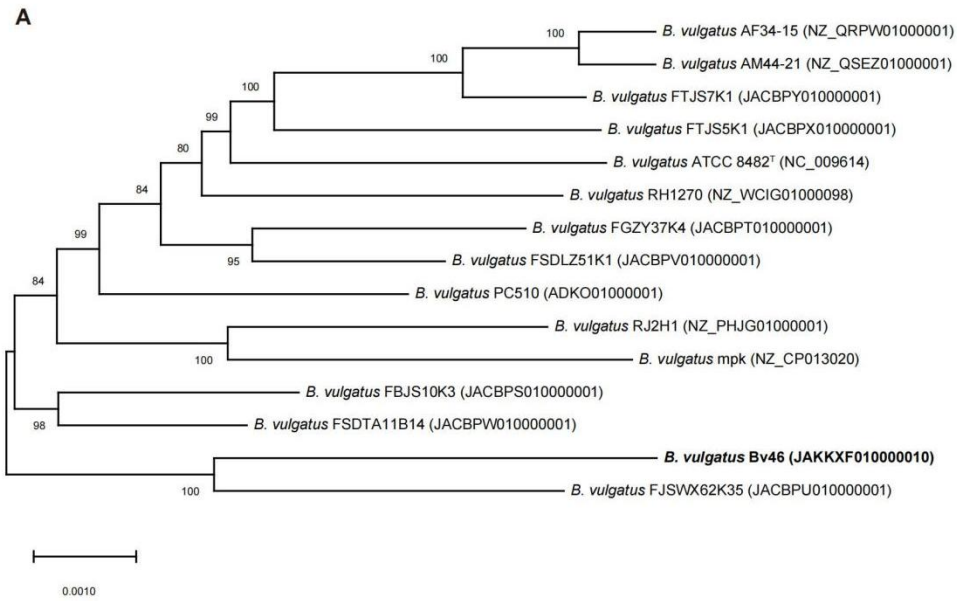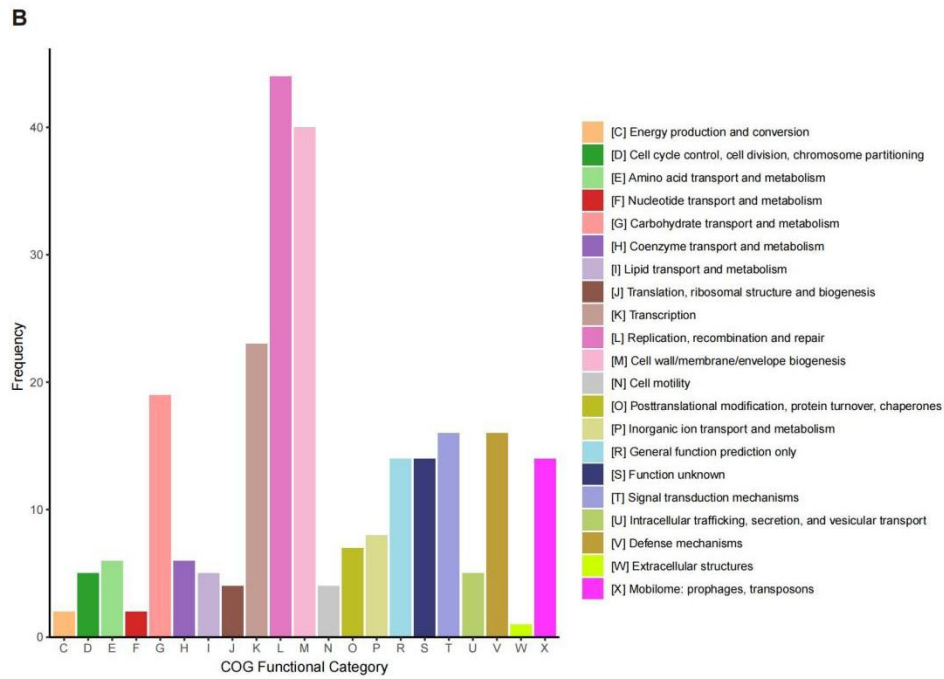

**FIGURE S1** Genome analysis of *B. vulgatus* strains. (A) The phylogenetic relationship of 15 *B. vulgatus* strains based on core genes. (B) The number of *B. vulgatus* Bv46 strain-specific genes assigned in COGs (Clusters of Orthologous Groups) categories.

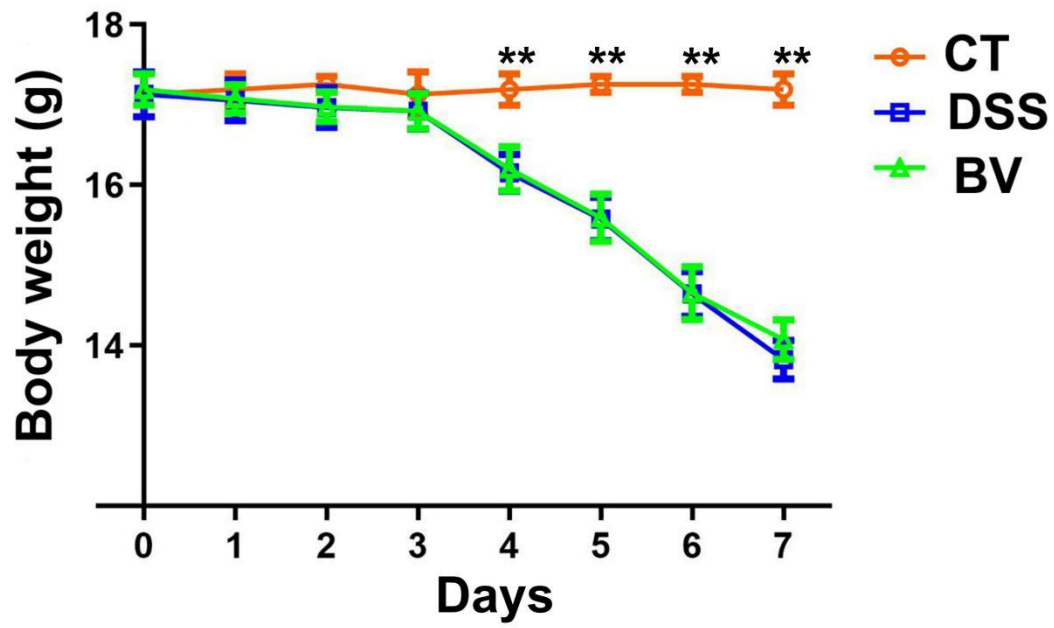

**FIGURE S2** Changes in body weight of DSS-induced mice treated with *B. vulgatus* Bv46 (in BV group), or phosphate buffer saline (in DSS group), and control (CT, no DSS induction) for 7 days. Values represent the mean  $\pm$  standard deviation. \*\*,  $P < 0.01$  indicated the significant differences of DSS group versus control group.

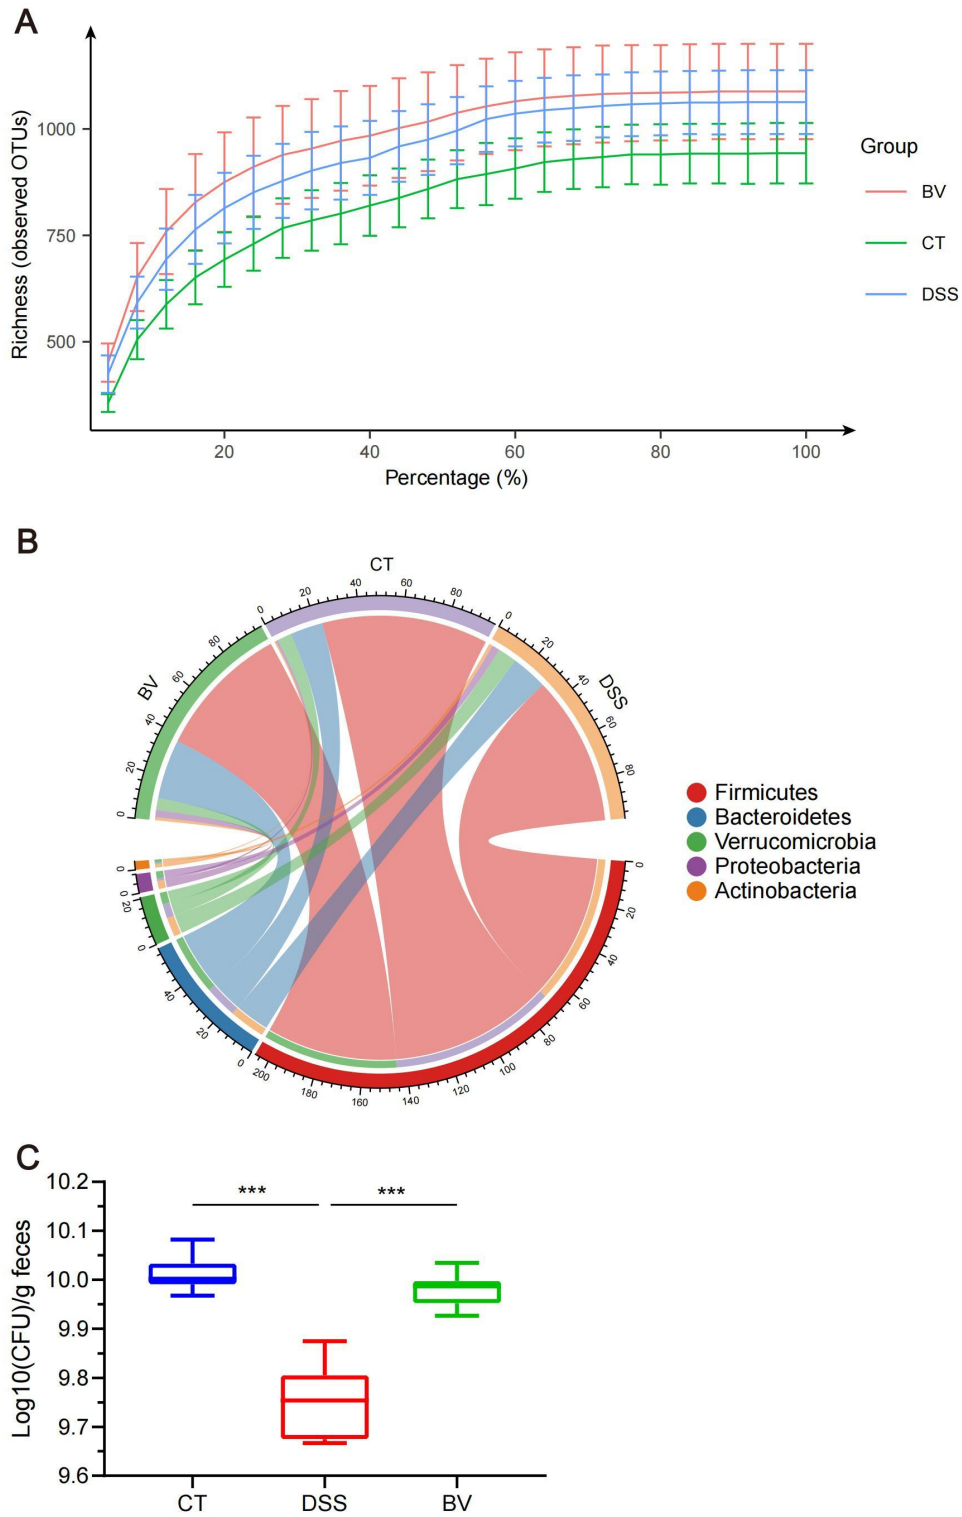

**FIGURE S3** (A) Rarefaction curve analysis of observed OUTs from the three groups based on random sampling. (B) Overview of the dominant bacterial phyla in the three groups. (C) Species specific qPCR-tracked *B. vulgatus* in feces of mice. Statistical comparison was implemented by a one-way ANOVA followed by Tukey's multiple-comparison test. Values are expressed as quartiles in each group, \*\*\*,  $P < 0.001$ .

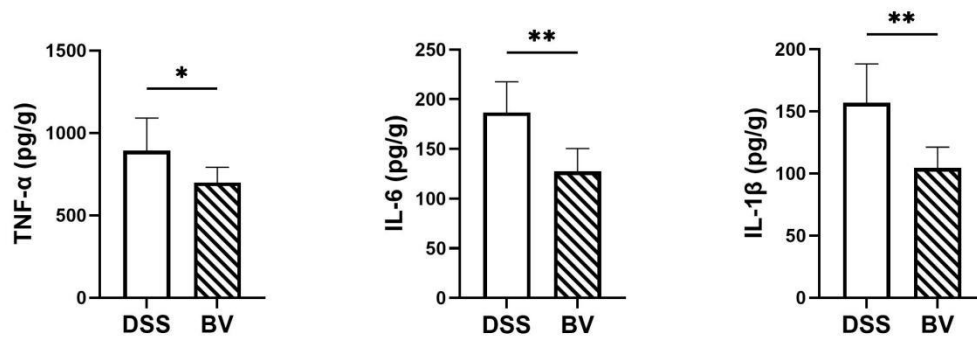

**FIGURE S4** The expression of colonic inflammatory cytokines (TNF- $\alpha$ , IL-6 and IL-1 $\beta$ ) in DSS and BV groups. Values represent the mean  $\pm$  standard deviation. Significance levels are shown as \*,  $P < 0.05$ ; \*\*,  $P < 0.01$ .
