# Supplementary material for: Bacteroides vulgatus attenuates experimental mice colitis through modulating gut microbiota and immune responses
Source: Front Immunol. 2022 Nov 30;13:1036196. doi: 10.3389/fimmu.2022.1036196 (PMC9750758; doi:10.3389/fimmu.2022.1036196)
Supplement: Supplementary file 1 [file Table_1.xlsx]

## Sheet: Table S1
Table S1 Primers used for qRT-PCR
Gene Name	Forward primer 5′-3′	Reverse primer 5′-3′
Ccl19	TGTGGCCTGCCTCAGATTAT	TTCCGCATCATTAGCACCCC
Cd19	TCATTGCAAGGTCAGCAGTGTG	GAGAAAAGCCACCAGAGAAACC
Cd22	GGCCAAGCGTGTGAGACTTT	CATTTCCTCCCTGGCACTCA
Cd40	CTGCTGGTCATTCCTGTCGT	CTGGAGCAGCGGTGTTATGA
Cxcr5	CACCAGCACAAACCTTCTCG	TCCTGTAGGGGAATCTCCGT
β-actin	TGGATGACGATATCGCTGCG	AGGGTCAGGATACCTCTCTT

## Sheet: Table S2
Table S2 COG annotation of the B. vulgatus Bv46 strain-specific genes
Locus	COG	Product	Gene
B. vulgatus 46 00517	M	CMP-2-keto-3-deoxyoctulosonic acid synthetase	KdsB
B. vulgatus 46 00143	U	Type IV secretory pathway, VirB4 component	VirB4
B. vulgatus 46 00800	M	Glycosyltransferase involved in cell wall bisynthesis	WcaA
B. vulgatus 46 00055	J	RNA-splicing ligase RtcB, repairs tRNA damage	RtcB
B. vulgatus 46 00801	M	PMT family glycosyltransferase ArnT/Agl22, involved in glycosylation of proteins and lipid IVA	ArnT
B. vulgatus 46 00697	U	Signal peptidase I	LepB
B. vulgatus 46 03423	G	Beta-xylosidase	XynB2
B. vulgatus 46 00109	U	Type IV secretory pathway, VirD4 component, TraG/TraD family ATPase	VirD4
B. vulgatus 46 01499	G	Alpha-L-arabinofuranosidase	AbfA
B. vulgatus 46 02960	L	3?5?helicase subunit RecB of the DNA repair enzyme RecBCD (exonuclease V)	RecB
B. vulgatus 46 02304	K	Predicted transcriptional regulator, contains HTH domain
B. vulgatus 46 00121	TK	DNA-binding response regulator, OmpR family, contains REC and winged-helix (wHTH) domain	OmpR
B. vulgatus 46 00121	T	Signal transduction histidine kinase	BaeS
B. vulgatus 46 02990	EG	Putative aminopeptidase FrvX	FrvX
B. vulgatus 46 00126	KX	DNA-binding transcriptional regulator AlpA	AlpA
B. vulgatus 46 00107	L	Site-specific recombinase XerD	XerD
B. vulgatus 46 00101	L	Superfamily II DNA and RNA helicase	SrmB
B. vulgatus 46 00101	KL	Superfamily II DNA or RNA helicase, SNF2 family	HepA
B. vulgatus 46 01941	X	Phage head maturation protease
B. vulgatus 46 00021	L	Site-specific recombinase XerD	XerD
B. vulgatus 46 03926	T	Serine/threonine protein kinase HipA, toxin component of the HipAB toxin-antitoxin module	HipA
B. vulgatus 46 02175	R	Acetyltransferase, isoleucine patch superfamily	WbbJ
B. vulgatus 46 00525	MO	NDP-sugar epimerase, includes UDP-GlcNAc-inverting 4,6-dehydratase FlaA1 and capsular polysaccharide biosynthesis protein EpsC	FlaA1
B. vulgatus 46 02178	G	Glycosyltransferase, GT2 family	WcaE
B. vulgatus 46 02794	T	Stress response protein SCP2	TerZ
B. vulgatus 46 02185	M	dTDP-4-amino-4,6-dideoxygalactose transaminase	WecE
B. vulgatus 46 02982	V	CRISPR/Cas system-associated endoribonuclease Cas2	Cas2
B. vulgatus 46 03448	O	Predicted Fe-Mo cluster-binding protein, NifX family	NifX
B. vulgatus 46 03448	R	Predicted DNA-binding protein, UPF0251 family
B. vulgatus 46 02179	M	Mannosyltransferase OCH1 or related enzyme	OCH1
B. vulgatus 46 02832	L	Bacterial nucleoid DNA-binding protein IHF-alpha	HimA
B. vulgatus 46 01255	M	ABC-type transport system involved in lipoprotein release, permease component LolC	LolE
B. vulgatus 46 01358	PT	Periplasmic ferric-dicitrate binding protein FecR, regulates iron transport	FecR
B. vulgatus 46 03970	U	Type IV secretory pathway, TrbF component	TrbF
B. vulgatus 46 00014	V	Type I restriction-modification system, DNA methylase subunit	HsdM
B. vulgatus 46 03444	GM	Predicted neuraminidase (sialidase)
B. vulgatus 46 03444	O	Formylglycine-generating enzyme, required for sulfatase activity, contains SUMF1/FGE domain	YfmG
B. vulgatus 46 04149	X	Transposase and inactivated derivatives, IS30 family	Tra8
B. vulgatus 46 00118	K	Predicted DNA-binding transcriptional regulator YobV, contains HTH and WYL domains	YobV
B. vulgatus 46 03730	K	Predicted transcriptional regulator, contains HTH domain
B. vulgatus 46 00498	M	Nucleoside-diphosphate-sugar epimerase	WcaG
B. vulgatus 46 02829	L	Nucleotidyltransferase/DNA polymerase DinP involved in DNA repair	DinP
B. vulgatus 46 00516	E	Isopropylmalate/homocitrate/citramalate synthases	LeuA
B. vulgatus 46 02830	KT	SOS-response transcriptional repressor LexA (RecA-mediated autopeptidase)	LexA
B. vulgatus 46 03982	L	Adenine specific DNA methylase Mod	Mod
B. vulgatus 46 00797	M	Glycosyltransferase involved in cell wall bisynthesis	RfaB
B. vulgatus 46 03159	R	Predicted nucleotidyltransferase MJ0435	MJ0435
B. vulgatus 46 02799	S	Uncharacterized conserved protein YegL, contains vWA domain of TerY type	TerY
B. vulgatus 46 01349	G	Predicted arabinose efflux permease AraJ, MFS family	AraJ
B. vulgatus 46 00799	I	Putative flippase GtrA (transmembrane translocase of bactoprenol-linked glucose)	GtrA
B. vulgatus 46 00048	L	Predicted Rossmann fold nucleotide-binding protein DprA/Smf involved in DNA uptake	Smf
B. vulgatus 46 00519	M	CMP-N-acetylneuraminic acid synthetase, NeuA/PseF family	NeuA
B. vulgatus 46 02582	G	Fucose permease	FucP
B. vulgatus 46 03132	P	Outer membrane receptor for ferrienterochelin and colicins	FepA
B. vulgatus 46 00094	L	ATP-dependent helicase YprA, contains C-terminal metal-binding DUF1998 domain	YprA
B. vulgatus 46 02992	L	Site-specific DNA recombinase SpoIVCA/DNA invertase PinE	SpoIVCA
B. vulgatus 46 03996	G	Alpha-glucosidase/xylosidase, GH31 family	YicI
B. vulgatus 46 00006	K	Predicted transcriptional regulator, contains an XRE-type HTH domain (archaeal members contain CBS pair)	AF2118
B. vulgatus 46 02781	S	Uncharacterized protein RhuM, Salmonella virulence factor	RhuM
B. vulgatus 46 01964	MDT	AAA+-type ATPase, SpoVK/Ycf46/Vps4 family	SpoVK
B. vulgatus 46 02183	G	Mannose-6-phosphate isomerase, cupin superfamily	ManC
B. vulgatus 46 02496	V	Na+-driven multidrug efflux pump, DinF/NorM/MATE family	NorM
B. vulgatus 46 01757	V	Restriction endonuclease, type III RM system	PM0699
B. vulgatus 46 00012	K	Transcriptional regulator, contains XRE-family HTH domain	HipB
B. vulgatus 46 02793	T	Stress response protein SCP2	TerZ
B. vulgatus 46 00013	V	Type I site-specific restriction-modification system, R (restriction) subunit and related helicases ...
B. vulgatus 46 02825	E	Agmatine/peptidylarginine deiminase	AguA
B. vulgatus 46 00387	M	UDP-glucose 6-dehydrogenase	Ugd
B. vulgatus 46 00116	L	Site-specific recombinase XerD	XerD
B. vulgatus 46 02810	O	Regulator of protease activity HflC, stomatin/prohibitin superfamily	HflC
B. vulgatus 46 04150	X	Transposase
B. vulgatus 46 00802	I	Phosphorylcholine metabolism protein LicD	LicD
B. vulgatus 46 01509	X	Transposase
B. vulgatus 46 00154	L	Site-specific recombinase XerD	XerD
B. vulgatus 46 01672	O	Pyruvate-formate lyase-activating enzyme	PflA
B. vulgatus 46 00499	M	Glycosyltransferase involved in cell wall bisynthesis	RfaB
B. vulgatus 46 02588	L	Site-specific recombinase XerD	XerD
B. vulgatus 46 01680	H	Protoporphyrinogen oxidase HemY/PPOX	HemY
B. vulgatus 46 01758	R	Predicted nuclease of restriction endonuclease-like (RecB) superfamily, DUF1016 family	YhcG
B. vulgatus 46 01357	K	DNA-directed RNA polymerase specialized sigma subunit, sigma24 family	RpoE
B. vulgatus 46 03202	L	Site-specific recombinase XerD	XerD
B. vulgatus 46 00804	E	Histidinol-phosphate/aromatic aminotransferase or cobyric acid decarboxylase	HisC
B. vulgatus 46 00510	M	Nucleoside-diphosphate-sugar epimerase	WcaG
B. vulgatus 46 03806	L	Site-specific recombinase XerD	XerD
B. vulgatus 46 00061	L	Nucleotidyltransferase/DNA polymerase DinP involved in DNA repair	DinP
B. vulgatus 46 01351	G	Beta-galactosidase/beta-glucuronidase	LacZ
B. vulgatus 46 00136	R	Predicted helicase
B. vulgatus 46 01300	M	Glycosyltransferase involved in cell wall bisynthesis	WcaA
B. vulgatus 46 00027	KX	DNA-binding transcriptional regulator AlpA	AlpA
B. vulgatus 46 03716	V	CRISPR-Cas system type-II protein Cas9	Cas9
B. vulgatus 46 01648	P	Outer membrane receptor for ferrienterochelin and colicins	FepA
B. vulgatus 46 00064	R	Predicted esterase YcpF, UPF0227 family	YcfP
B. vulgatus 46 01294	S	Uncharacterized protein RhuM, Salmonella virulence factor	RhuM
B. vulgatus 46 00138	V	Abortive infection bacteriophage resistance protein	AbiF
B. vulgatus 46 02798	T	Stress response protein SCP2	TerZ
B. vulgatus 46 00572	E	Tryptophan synthase alpha chain	TrpA
B. vulgatus 46 00277	X	Transposase InsA	InsA
B. vulgatus 46 00277	X	Transposase and inactivated derivatives
B. vulgatus 46 02715	H	Outer membrane cobalamin receptor protein BtuB	BtuB
B. vulgatus 46 00008	T	Serine/threonine protein kinase HipA, toxin component of the HipAB toxin-antitoxin module	HipA
B. vulgatus 46 01352	G	Beta-galactosidase GanA	GanA
B. vulgatus 46 01744	R	Radical SAM superfamily enzyme YgiQ, UPF0313 family	YgiQ
B. vulgatus 46 01350	NW	Type IV pilus assembly protein PilF/PilW	PilF
B. vulgatus 46 01350	CO	Cytochrome c-type biogenesis protein CcmH/NrfG	NrfG
B. vulgatus 46 01972	L	Site-specific recombinase XerD	XerD
B. vulgatus 46 04139	L	Site-specific DNA recombinase SpoIVCA/DNA invertase PinE	SpoIVCA
B. vulgatus 46 01968	S	Uncharacterized membrane protein YkvA, DUF1232 family	YkvA
B. vulgatus 46 02956	L	DNA primase (bacterial type)	DnaG
B. vulgatus 46 00016	V	Restriction endonuclease S subunit	HsdS
B. vulgatus 46 01761	KL	Superfamily II DNA or RNA helicase, SNF2 family	HepA
B. vulgatus 46 00106	L	Site-specific recombinase XerD	XerD
B. vulgatus 46 02805	R	Uncharacterized conserved protein YegI with protein kinase and helix-hairpin-helix DNA-binding domains	YegI
B. vulgatus 46 01727	M	Glycosyltransferase involved in cell wall bisynthesis	WcaA
B. vulgatus 46 02803	S	Uncharacterized conserved protein YegL, contains vWA domain of TerY type	TerY
B. vulgatus 46 02861	H	Ubiquinone/menaquinone biosynthesis C-methylase UbiE/MenG	UbiE
B. vulgatus 46 00164	L	Site-specific recombinase XerD	XerD
B. vulgatus 46 00790	N	Glycosyltransferase, catalytic subunit of cellulose synthase and poly-beta-1,6-N-acetylglucosamine synthase	BcsA
B. vulgatus 46 02801	S	Uncharacterized conserved protein YegL, contains vWA domain of TerY type	TerY
B. vulgatus 46 02800	S	Uncharacterized conserved protein YegL, contains vWA domain of TerY type	TerY
B. vulgatus 46 00805	M	Phosphoglycerol transferase MdoB/OpgB, AlkP superfamily	MdoB
B. vulgatus 46 01498	M	O-Glycosyl hydrolase	XynC
B. vulgatus 46 01295	L	Site-specific recombinase XerD	XerD
B. vulgatus 46 03424	G	Beta-xylosidase	XynB2
B. vulgatus 46 00043	L	DNA polymerase III, epsilon subunit or related 3'-5' exonuclease	DnaQ
B. vulgatus 46 00523	M	UDP-N-acetylglucosamine 2-epimerase	WecB
B. vulgatus 46 01671	C	Pyruvate-formate lyase	PflD
B. vulgatus 46 00796	V	ABC-type multidrug transport system, ATPase and permease component	MdlB
B. vulgatus 46 02187	M	UDP-N-acetyl-D-mannosaminuronic acid transferase, WecB/TagA/CpsF family	WecG
B. vulgatus 46 00515	G	Archaeal fructose-1,6-bisphosphatase or related enzyme, inositol monophosphatase family	SuhB
B. vulgatus 46 02786	L	Site-specific DNA recombinase SpoIVCA/DNA invertase PinE	SpoIVCA
B. vulgatus 46 03168	L	DNA-adenine methylase	Dam
B. vulgatus 46 03974	U	Type IV secretory pathway, VirB4 component	VirB4
B. vulgatus 46 00159	F	Uridine phosphorylase	Udp
B. vulgatus 46 00521	EF	Carbamoylphosphate synthase large subunit	CarB
B. vulgatus 46 01728	M	Glycosyltransferase involved in cell wall bisynthesis	RfaB
B. vulgatus 46 01759	L	Adenine specific DNA methylase Mod	Mod
B. vulgatus 46 01310	X	Bacteriophage protein gp37
B. vulgatus 46 00787	M	UDP-galactopyranose mutase	Glf
B. vulgatus 46 01670	M	Membrane protein involved in the export of O-antigen and teichoic acid	RfbX
B. vulgatus 46 01899	H	Protoporphyrinogen oxidase HemY/PPOX	HemY
B. vulgatus 46 04116	K	DNA-binding transcriptional regulator, CsgD family	CsgD
B. vulgatus 46 04116	X	Transposase
B. vulgatus 46 00786	I	Palmitoleoyl-ACP: Kdo2-lipid-IV acyltransferase (lipid A biosynthesis)	LpxP
B. vulgatus 46 01359	P	Outer membrane receptor for ferrienterochelin and colicins	FepA
B. vulgatus 46 03983	V	Restriction endonuclease, type III RM system	PM0699
B. vulgatus 46 00099	L	Predicted ATP-dependent endonuclease of the OLD family, contains P-loop ATPase and TOPRIM domains	YbjD
B. vulgatus 46 00508	JM	NDP-sugar pyrophosphorylase, includes eIF-2Bgamma, eIF-2Bepsilon, and LPS biosynthesis protein s	GCD1
B. vulgatus 46 01303	G	Glycosyltransferase, GT2 family	WcaE
B. vulgatus 46 00168	L	Site-specific recombinase XerD	XerD
B. vulgatus 46 01881	V	ABC-type antimicrobial peptide transport system, permease component	SalY
B. vulgatus 46 01881	M	ABC-type transport system involved in lipoprotein release, permease component LolC	LolE
B. vulgatus 46 02106	L	Superfamily II DNA helicase RecQ	RecQ
B. vulgatus 46 02106	L	ATPase/5?3?helicase helicase subunit RecD of the DNA repair enzyme RecBCD (exonuclease V)	RecD
B. vulgatus 46 02804	T	Serine/threonine protein phosphatase PrpC	PTC1
B. vulgatus 46 03795	M	N-acetyl-anhydromuramyl-L-alanine amidase AmpD	AmpD
B. vulgatus 46 00108	M	Phage-related lysozyme (muramidase), GH24 family	RrrD
B. vulgatus 46 00015	S	Uncharacterized protein RhuM, Salmonella virulence factor	RhuM
B. vulgatus 46 01959	K	Predicted DNA-binding transcriptional regulator YobV, contains HTH and WYL domains	YobV
B. vulgatus 46 00524	M	dTDP-4-amino-4,6-dideoxygalactose transaminase	WecE
B. vulgatus 46 00135	L	Site-specific recombinase XerD	XerD
B. vulgatus 46 00803	I	Choline kinase
B. vulgatus 46 00507	M	dTDP-4-amino-4,6-dideoxygalactose transaminase	WecE
B. vulgatus 46 03923	D	Chromosome segregation ATPase Smc	Smc
B. vulgatus 46 02795	V	Tellurium resistance protein TerA/TerD	TerA
B. vulgatus 46 02796	T	Stress response protein SCP2	TerZ
B. vulgatus 46 02854	L	Antirestriction protein ArdC	ArdC
B. vulgatus 46 02306	H	Outer membrane cobalamin receptor protein BtuB	BtuB
B. vulgatus 46 00792	M	Glycosyltransferase involved in cell wall bisynthesis	WcaA
B. vulgatus 46 01003	L	Site-specific recombinase XerD	XerD
B. vulgatus 46 02587	L	Site-specific recombinase XerD	XerD
B. vulgatus 46 00030	S	Uncharacterized protein RhuM, Salmonella virulence factor	RhuM
B. vulgatus 46 01305	M	Glycosyltransferase involved in cell wall bisynthesis	RfaB
B. vulgatus 46 01640	H	Outer membrane cobalamin receptor protein BtuB	BtuB
B. vulgatus 46 02984	S	Uncharacterized protein RhuM, Salmonella virulence factor	RhuM
B. vulgatus 46 00798	M	Phosphoglycerol transferase MdoB/OpgB, AlkP superfamily	MdoB
B. vulgatus 46 01805	V	ABC-type antimicrobial peptide transport system, permease component	SalY
B. vulgatus 46 02823	L	DNA repair protein RadC, contains a helix-hairpin-helix DNA-binding motif	RadC
B. vulgatus 46 00179	L	Site-specific recombinase XerD	XerD
B. vulgatus 46 03122	G	Alpha-L-fucosidase	AfuC
B. vulgatus 46 02184	G	Mannose-6-phosphate isomerase, cupin superfamily	ManC
B. vulgatus 46 00166	KX	DNA-binding transcriptional regulator AlpA	AlpA
B. vulgatus 46 00144	R	ATPase components of ABC transporters with duplicated ATPase domains	Uup
B. vulgatus 46 01297	K	Transcription termination/antitermination protein NusG	NusG
B. vulgatus 46 02952	R	Predicted nuclease of restriction endonuclease-like (RecB) superfamily, DUF1016 family	YhcG
B. vulgatus 46 00784	M	ADP-heptose:LPS heptosyltransferase	RfaF
B. vulgatus 46 03421	P	Outer membrane receptor protein, Fe transport	CirA
B. vulgatus 46 00520	M	Sialic acid synthase SpsE, contains C-terminal SAF domain	SpsE
B. vulgatus 46 00031	L	Site-specific recombinase XerD	XerD
B. vulgatus 46 03124	P	Outer membrane receptor protein, Fe transport	CirA
B. vulgatus 46 00093	L	Superfamily I DNA or RNA helicase	UvrD
B. vulgatus 46 01642	G	Pectate lyase	PelB
B. vulgatus 46 02783	K	Fic family protein
B. vulgatus 46 02797	T	Stress response protein SCP2	TerZ
B. vulgatus 46 02862	T	HD-GYP domain, c-di-GMP phosphodiesterase class II (or its inactivated variant)	HDGYP
B. vulgatus 46 02791	S	Uncharacterized conserved protein
B. vulgatus 46 00388	M	Glycosyltransferase involved in cell wall bisynthesis	RfaB
B. vulgatus 46 00102	K	Transcriptional regulator, contains XRE-family HTH domain	HipB
B. vulgatus 46 04129	L	Site-specific DNA recombinase SpoIVCA/DNA invertase PinE	SpoIVCA
B. vulgatus 46 03306	DN	ParA-like ATPase involved in chromosome/plasmid partitioning or cellulose biosynthesis protein BcsQ	ParA
B. vulgatus 46 01291	L	DNA primase (bacterial type)	DnaG
B. vulgatus 46 02811	P	Magnesium-transporting ATPase (P-type)	MgtA
B. vulgatus 46 00095	J	O-acetyl-ADP-ribose deacetylase (regulator of RNase III), contains Macro domain	YmdB
B. vulgatus 46 03931	R	Uncharacterized conserved protein MJ1445, calcineurin-like phosphoesterase superfamily
B. vulgatus 46 00509	M	dTDP-4-dehydrorhamnose 3,5-epimerase or related enzyme	RfbC
B. vulgatus 46 03173	I	Phosphatidylserine/phosphatidylglycerophosphate/cardiolipin synthase	Cls
B. vulgatus 46 02983	V	CRISPR-Cas system-associated integrase Cas1	Cas1
B. vulgatus 46 02951	L	Site-specific recombinase XerD	XerD
B. vulgatus 46 02806	T	Membrane proteinase PrsW, cleaves anti-sigma factor RsiW, M82 family	PrsW
B. vulgatus 46 00175	KX	DNA-binding transcriptional regulator AlpA	AlpA
B. vulgatus 46 03190	L	Site-specific DNA recombinase SpoIVCA/DNA invertase PinE	SpoIVCA
B. vulgatus 46 02581	S	Regulation of enolase protein 1 (function unknown), concanavalin A-like superfamily	Ree1
B. vulgatus 46 00794	M	Glycosyltransferase involved in cell wall bisynthesis	RfaB
B. vulgatus 46 00738	V	ABC-type bacteriocin/lantibiotic exporters, contain an N-terminal double-glycine peptidase domain	SunT
B. vulgatus 46 03733	KX	DNA-binding transcriptional regulator AlpA	AlpA
B. vulgatus 46 02719	G	1,4-alpha-glucan branching enzyme	GlgB
B. vulgatus 46 00518	JM	NDP-sugar pyrophosphorylase, includes eIF-2Bgamma, eIF-2Bepsilon, and LPS biosynthesis protein s	GCD1
B. vulgatus 46 02478	G	Periplasmic beta-glucosidase and related glycosidases	BglX
B. vulgatus 46 02860	X	Transposase
B. vulgatus 46 00042	K	Predicted DNA-binding transcriptional regulator YobV, contains HTH and WYL domains	YobV
B. vulgatus 46 03449	P	Outer membrane receptor for ferrienterochelin and colicins	FepA
B. vulgatus 46 01293	X	DNA primase, phage- or plasmid-associated
B. vulgatus 46 04115	L	DNA replication protein DnaC	DnaC
B. vulgatus 46 02577	TK	DNA-binding response regulator, OmpR family, contains REC and winged-helix (wHTH) domain	OmpR
B. vulgatus 46 02577	T	Signal transduction histidine kinase	BaeS
B. vulgatus 46 02721	O	Serine protease, subtilisin family	AprE
B. vulgatus 46 00038	DN	ParA-like ATPase involved in chromosome/plasmid partitioning or cellulose biosynthesis protein BcsQ	ParA
B. vulgatus 46 01348	K	AraC-type DNA-binding domain and AraC-containing proteins	AraC
B. vulgatus 46 01348	R	Cupin domain protein related to quercetin dioxygenase	QdoI
B. vulgatus 46 00119	S	Uncharacterized protein RhuM, Salmonella virulence factor	RhuM
B. vulgatus 46 01949	V	5-methylcytosine-specific restriction endonuclease McrA	McrA
B. vulgatus 46 01289	R	MFS-type transporter involved in bile tolerance, Atg22 family	BtlA
B. vulgatus 46 00002	MDT	AAA+-type ATPase, SpoVK/Ycf46/Vps4 family	SpoVK
B. vulgatus 46 04098	L	Site-specific DNA recombinase SpoIVCA/DNA invertase PinE	SpoIVCA
B. vulgatus 46 01674	R	Acetyltransferase, isoleucine patch superfamily	WbbJ
B. vulgatus 46 02586	S	Uncharacterized protein RhuM, Salmonella virulence factor	RhuM

## Sheet: Table S3
Table S3 Carbohydrate active enzymes (CAZymes) encoded by strain-specific genes of B. vulgatus Bv46
Gene ID	Class	Family	Product	Gene
B. vulgatus 46 02811	Carbohydrate-Binding Modules	CBM50	Magnesium-transporting ATPase (P-type)	MgtA
B. vulgatus 46 02719	Glycoside Hydrolases	GH13_10	1,4-alpha-glucan branching enzyme	GlgB
B. vulgatus 46 01351	Glycoside Hydrolases	GH2	Beta-galactosidase/beta-glucuronidase
B. vulgatus 46 00108	Glycoside Hydrolases	GH24	Phage-related lysozyme (muramidase), GH24 family	RrrD
B. vulgatus 46 03122	Glycoside Hydrolases	GH29	Alpha-L-fucosidase	AfuC
B. vulgatus 46 02478	Glycoside Hydrolases	GH3	Periplasmic beta-glucosidase and related glycosidases
B. vulgatus 46 01498	Glycoside Hydrolases	GH30_2	O-Glycosyl hydrolase
B. vulgatus 46 03996	Glycoside Hydrolases	GH31	Alpha-glucosidase/xylosidase, GH31 family	YicI
B. vulgatus 46 03444	Glycoside Hydrolases	GH33	Predicted neuraminidase (sialidase)
B. vulgatus 46 01352	Glycoside Hydrolases	GH35	Beta-galactosidase GanA
B. vulgatus 46 03423	Glycoside Hydrolases	GH43_10	Beta-xylosidase	XynB2
B. vulgatus 46 03424	Glycoside Hydrolases	GH43_10	Beta-xylosidase	XynB2
B. vulgatus 46 01499	Glycoside Hydrolases	GH51	Alpha-L-arabinofuranosidase
B. vulgatus 46 00788	Glycosyl Transferases	GT113	Beta-1,6-galactofuranosyltransferase WbbI	wbbI
B. vulgatus 46 00790	Glycosyl Transferases	GT2	Glycosyltransferase, catalytic subunit of cellulose synthase and poly-beta-1,6-N-acetylglucosamine synthase
B. vulgatus 46 00792	Glycosyl Transferases	GT2	Glycosyltransferase involved in cell wall bisynthesis
B. vulgatus 46 00793	Glycosyl Transferases	GT2	Undecaprenyl-phosphate 4-deoxy-4-formamido-L-arabinose transferase	arnC_3
B. vulgatus 46 00800	Glycosyl Transferases	GT2	Glycosyltransferase involved in cell wall bisynthesis
B. vulgatus 46 01300	Glycosyl Transferases	GT2	Glycosyltransferase involved in cell wall bisynthesis
B. vulgatus 46 01303	Glycosyl Transferases	GT2	Glycosyltransferase, GT2 family
B. vulgatus 46 01681	Glycosyl Transferases	GT2	Undecaprenyl-phosphate 4-deoxy-4-formamido-L-arabinose transferase	arnC_4
B. vulgatus 46 01727	Glycosyl Transferases	GT2	Glycosyltransferase involved in cell wall bisynthesis
B. vulgatus 46 02178	Glycosyl Transferases	GT2	Glycosyltransferase, GT2 family
B. vulgatus 46 02180	Glycosyl Transferases	GT2	Undecaprenyl-phosphate 4-deoxy-4-formamido-L-arabinose transferase	arnC_6
B. vulgatus 46 02187	Glycosyl Transferases	GT26	UDP-N-acetyl-D-mannosaminuronic acid transferase, WecB/TagA/CpsF family
B. vulgatus 46 02179	Glycosyl Transferases	GT32	Mannosyltransferase OCH1 or related enzyme
B. vulgatus 46 00392	Glycosyl Transferases	GT4	D-inositol-3-phosphate glycosyltransferase	mshA_1
B. vulgatus 46 00499	Glycosyl Transferases	GT4	Glycosyltransferase involved in cell wall bisynthesis
B. vulgatus 46 00500	Glycosyl Transferases	GT4	D-inositol-3-phosphate glycosyltransferase	mshA_1
B. vulgatus 46 00794	Glycosyl Transferases	GT4	Glycosyltransferase involved in cell wall bisynthesis
B. vulgatus 46 00797	Glycosyl Transferases	GT4	Glycosyltransferase involved in cell wall bisynthesis
B. vulgatus 46 01304	Glycosyl Transferases	GT4	D-inositol-3-phosphate glycosyltransferase	mshA_7
B. vulgatus 46 01305	Glycosyl Transferases	GT4	Glycosyltransferase involved in cell wall bisynthesis
B. vulgatus 46 01685	Glycosyl Transferases	GT4	Alpha-maltose-1-phosphate synthase	glgM
B. vulgatus 46 01728	Glycosyl Transferases	GT4	Glycosyltransferase involved in cell wall bisynthesis
B. vulgatus 46 00387	Glycosyl Transferases	GT4	UDP-glucose 6-dehydrogenase	Ugd
B. vulgatus 46 00388	Glycosyl Transferases	GT4	Glycosyltransferase involved in cell wall bisynthesis	RfaB
B. vulgatus 46 00801	Glycosyl Transferases	GT83	PMT family glycosyltransferase ArnT/Agl22, involved in glycosylation of proteins and lipid IVA
B. vulgatus 46 00784	Glycosyl Transferases	GT9	ADP-heptose:LPS heptosyltransferase
B. vulgatus 46 01642	Polysaccharide Lyase	PL1_2	Pectate lyase

## Sheet: Table S4
Table S4 GO biological processes were enriched in the up-regulated and down-regulated DEGs in the BV vs DSS groups
ID	Description	GeneRatio	BgRatio	Pvalue	P.adjust	geneID	Count	Group
GO:2000252	negative regulation of feeding behavior	2022-02-20	17/23355	9.40229e-05	0.0278569	Retn/Lepr	2	BV._higherThan_.DSS
GO:0070269	pyroptosis	2022-02-20	25/23355	0.000206553	0.0278569	Gsdmc3/Gsdmc2	2	BV._higherThan_.DSS
GO:0042744	hydrogen peroxide catabolic process	2022-02-20	28/23355	0.000259856	0.0278569	Hba-a1/Hbb-bt	2	BV._higherThan_.DSS
GO:0048521	negative regulation of behavior	2022-02-20	30/23355	0.000298734	0.0278569	Retn/Lepr	2	BV._higherThan_.DSS
GO:0042113	B cell activation	14/67	423/23355	1.34935e-11	1.64621e-08	Fcrl1/Cd79a/Cd79b/Cd19/Pou2af1/Ms4a1/Cxcr5/Siglecg/Bst1/Cr2/Cd40/Tnfrsf13c/Cd22/Bank1	14	BV._lowerThan_.DSS
GO:0042100	B cell proliferation	8/67	114/23355	1.28961e-09	7.86662e-07	Cd79a/Cd19/Siglecg/Bst1/Cr2/Cd40/Tnfrsf13c/Cd22	8	BV._lowerThan_.DSS
GO:0032943	mononuclear cell proliferation	10/67	323/23355	2.75037e-08	8.38863e-06	Cd79a/Cd19/Ccl19/Siglecg/Bst1/Cr2/Cd40/Hells/Tnfrsf13c/Cd22	10	BV._lowerThan_.DSS
GO:0030888	regulation of B cell proliferation	5/67	70/23355	1.74886e-06	0.000355602	Siglecg/Bst1/Cd40/Tnfrsf13c/Cd22	5	BV._lowerThan_.DSS
GO:0030183	B cell differentiation	6/67	159/23355	6.41505e-06	0.00111805	Cd79a/Cd79b/Cd19/Pou2af1/Ms4a1/Cr2	6	BV._lowerThan_.DSS
GO:0050864	regulation of B cell activation	7/67	272/23355	1.28872e-05	0.0019653	Cd19/Siglecg/Bst1/Cd40/Tnfrsf13c/Cd22/Bank1	7	BV._lowerThan_.DSS
GO:0002253	activation of immune response	8/67	420/23355	2.6404e-05	0.00338865	Cd79a/Cd79b/Cd19/Sting1/Ms4a1/Ifi209/Cr2/Cd22	8	BV._lowerThan_.DSS
GO:0032944	regulation of mononuclear cell proliferation	6/67	235/23355	5.81983e-05	0.00546168	Ccl19/Siglecg/Bst1/Cd40/Tnfrsf13c/Cd22	6	BV._lowerThan_.DSS
GO:0090022	regulation of neutrophil chemotaxis	3/67	34/23355	0.000126701	0.010305	Ccl19/Bst1/Sell	3	BV._lowerThan_.DSS
GO:0050853	B cell receptor signaling pathway	5/67	181/23355	0.000173168	0.013204	Cd79a/Cd79b/Cd19/Ms4a1/Cd22	5	BV._lowerThan_.DSS

## Sheet: Table S5
Table S5 Colonic DEGs gene enriched in GO biological process and KEGG pathway
Gene ID	Gene Symbol	Log2(FC)	P. value	P. adjust	GO-BP term	KEGG pathway
ENSMUSG00000030724	Cd19	-2.666	2.054e-06	0.0005741	B cell activation	Primary Immunodeficiency
					B cell proliferation	B Cell Receptor Signaling Pathway
					Mononuclear cell proliferation
					B cell differentiation
					Regulation of B cell activation
					B cell receptor signaling pathway
					Activation of immune response
ENSMUSG00000030577	Cd22	-1.803	0.0007597	0.02282	B cell activation	Cell Adhesion Molecules Cams
					B cell proliferation	B Cell Receptor Signaling Pathway
					Mononuclear cell proliferation
					Regulation of B cell proliferation
					Regulation of B cell activation
					Activation of immune response
					Regulation of mononuclear cell proliferation
					B cell receptor signaling pathway
ENSMUSG00000017652	Cd40	-1.864	0.0002412	0.01097	B cell activation	Cytokine Cytokine Receptor Interaction
					B cell proliferation	Primary Immunodeficiency
					Mononuclear cell proliferation	Intestinal Immune Network For Iga Production
					Regulation of B cell proliferation	Cell Adhesion Molecules Cams
					Regulation of B cell activation	Toll Like Receptor Signaling Pathway
					Regulation of mononuclear cell proliferation
ENSMUSG00000003379	Cd79a	-2.497	2.516e-07	0.0001344	B cell activation	Antigen Processing And Presentation
					B cell proliferation	Primary Immunodeficiency
					mononuclear cell proliferation
					B cell differentiation
					Activation of immune response
					B cell receptor signaling pathway
ENSMUSG00000030468	Siglecg	-1.775	0.0001343	0.00767	B cell activation
					B cell proliferation
					Mononuclear cell proliferation
					Regulation of B cell proliferation
					Regulation of B cell activation
					Regulation of mononuclear cell proliferation
ENSMUSG00000029082	Bst1	-1.688	0.000147	0.008267	B cell activation
					B cell proliferation
					Mononuclear cell proliferation
					Regulation of B cell proliferation
					Regulation of B cell activation
					Regulation of mononuclear cell proliferation
					Regulation of neutrophil chemotaxis
ENSMUSG00000068105	Tnfrsf13c	-2.061	0.000361	0.01388	B cell activation	Primary Immunodeficiency
					B cell proliferation	Cytokine Cytokine Receptor Interaction
					Mononuclear cell proliferation	Intestinal Immune Network For Iga Production
					Regulation of B cell proliferation
					Regulation of B cell activation
					Regulation of mononuclear cell proliferation

## Sheet: Table S6
Table S6 B. vulgatus Bv46 induced changes of KEGG pathways identified by the gene set enrichment analysis (GSEA) in colons
KEGG pathway	SetSize	EnrichmentScore	NES	Pvalue	P.adjust	Core_enrichment
Hematopoietic Cell Lineage	77	-0.689416	-2.66577	1e-10	3.7e-09	Itga3/Csf2/H2-Eb1/Cd2/Itga6/Il11/Csf2ra/Csf1/Cd5/Il3ra/Il6/Il1r1/Il6ra/Cd37/Itga4/Il1a/Il1b/Il9r/Csf3/Il7r/Csf3r/Flt3/Il1r2/Csf1r/Fcer2a/Cr2/Cd38/Il5ra/Cd33/Cd55b/Il2ra/Il4ra/Cd4/Tfrc/Itgam/Tnf/Fcgr1/Cd14/Cd22/Ms4a1/Thpo/Cd19
Cytokine Cytokine Receptor Interaction	217	-0.56042	-2.53606	1e-10	3.7e-09	Lifr/Csf2/Tnfsf18/Tnfrsf10b/Il18/Ccr3/Tnfrsf4/Ppbp/Tnfrsf1a/Il11/Tgfbr2/Il2rb/Ifnar2/Inhba/Ccr5/Ccr4/Met/Il18rap/Csf2ra/Csf1/Tnfsf13b/Il21/Tgfbr1/Crlf2/Lif/Il12rb1/Il19/Pdgfra/Il3ra/Cxcl11/Il6/Flt1/Pdgfrb/Plekho2/Il1r1/Cxcl10/Il6ra/Cxcr1/Ccl4/Hgf/Il6st/Osm/Tnfsf11/Ccl3/Il1a/Il1b/Il10/Ccl2/Cxcl12/Cxcl9/Il9r/Cxcr2/Cxcl2/Il17a/Cxcl1/Cd27/Il15ra/Csf3/Ccl21a/Vegfd/Relt/Il7r/Cxcl3/Csf3r/Tnfrsf9/Ltb/Ccl…
Spliceosome	123	-0.608569	-2.52404	1e-10	3.7e-09	Snrpc/Lsm4/Sf3b2/Snrnp70/Sart1/Crnkl1/Lsm3/Sf3b4/Srsf9/U2af2/Prpf38a/Thoc3/Prpf8/Eif4a3/Lsm7/Dhx16/Prpf19/Ddx23/Magoh/Ncbp1/Srsf2/Eftud2/Acin1/Srsf3/Snrpe/Pcbp1/Cdc40/Rbm17/Bcas2/Dhx38/Lsm8/U2af1/Thoc2/Ddx46/Rbm25/Cherp/Snrnp200/Prpf40a/Sf3a2/Hnrnpc/Wbp11/Prpf38b/Snrpd3/Dhx15/Ppih/Rbm8a/Isy1/Snrnp40/Srsf7/Sf3a3/Srsf1/Lsm6/Thoc1/Tra2b/U2surp/Cdc5l/Tcerg1/Lsm5/Prpf31/Hnrnpk/Snrpg/Snrpa1/Hspa2/Ncbp2…
Leishmania Infection	65	-0.656892	-2.47041	1e-10	3.7e-09	Mapk14/Nfkb1/Tgfb1/Irak1/H2-DMa/H2-Eb1/Cyba/H2-Ab1/Irak4/Tlr4/Ptgs2/Ncf4/Myd88/Itga4/Il1a/H2-Aa/Il1b/Il10/Prkcb/Il12b/Ifng/Stat1/Nos2/Ncf2/Marcksl1/H2-DMb1/H2-DMb2/Itgam/Ncf1/Tnf/H2-Oa/Fcgr1/Fcgr3/Itgb2/H2-Ob/C3/Fcgr4/Fcgr2b
Primary Immunodeficiency	33	-0.743079	-2.44863	1.33e-08	2.46e-07	Ptprc/Il7r/Tap1/Il2rg/Cd79a/Cd4/Btk/Jak3/Cd40/Tnfrsf13c/Ciita/Cd19
Complement And Coagulation Cascades	62	-0.641523	-2.39775	1.56e-09	4.11e-08	F3/F2r/Cfi/Fgb/C1rb/Plaur/Serpine1/Plat/Serping1/Fgg/Bdkrb1/Pros1/Vwf/Fga/C6/Serpina1e/Serpina1b/F7/F5/Cfb/C1qb/C1qa/Cr2/C3ar1/Cd55b/F10/Kng2/C1qc/C5ar1/C4b/A2m/C7/F13a1/C3/Cfh
Nod Like Receptor Signaling Pathway	58	-0.615649	-2.25892	6.62e-08	1.02e-06	Nfkbia/Casp8/Mapk14/Nfkb1/Card6/Mapk8/Nlrc4/Nod1/Il18/Birc2/Tnfaip3/Ripk2/Il6/Il1b/Ccl2/Cxcl2/Cxcl1/Nlrp3/Nlrp1a/Cxcl3/Hsp90b1/Ccl7/Hsp90ab1/Mefv/Ccl11/Pstpip1/Card9/Tnf/Ccl12/Hsp90aa1
B Cell Receptor Signaling Pathway	75	-0.585664	-2.25144	3.02e-08	5.08e-07	Vav1/Rac3/Dapp1/Nras/Inpp5d/Syk/Prkcb/Pik3cd/Cr2/Cd79a/Ifitm1/Nfkbie/Lyn/Cd79b/Pik3ap1/Cd72/Btk/Pirb/Cd22/Cd19/Fcgr2b
Antigen Processing And Presentation	58	-0.602604	-2.21106	2.21e-07	2.56e-06	H2-M3/Tap2/H2-DMa/Hspa4/Psme3/Nfyb/Nfya/H2-Eb1/H2-Ab1/Hspa2/Hspa1a/H2-Q7/Creb1/Canx/H2-Aa/Cd74/Hspa5/Tap1/Hsp90ab1/Cd4/Lta/Lgmn/H2-DMb1/H2-M2/H2-DMb2/Hspa1b/Hspa8/H2-Oa/Hsp90aa1/Ciita/H2-Ob
Intestinal Immune Network For Iga Production	42	-0.638146	-2.21083	2.91e-06	2.99e-05	H2-Eb1/Icosl/H2-Ab1/Tnfsf13b/Icos/Il6/Itgb7/Cd80/Itga4/H2-Aa/Il10/Cxcl12/Map3k14/Il15ra/Cxcr4/H2-DMb1/Cd86/H2-DMb2/Madcam1/H2-Oa/Cd40/Tnfrsf13c/H2-Ob
Jak Stat Signaling Pathway	123	-0.527872	-2.18934	3.66e-09	8.46e-08	Il11/Spred1/Spry4/Il2rb/Ifnar2/Csf2ra/Stat4/Il21/Crlf2/Lif/Il12rb1/Il19/Il3ra/Il6/Socs1/Stat3/Il6ra/Pim1/Il6st/Osm/Il10/Il9r/Il15ra/Csf3/Pik3cd/Il7r/Csf3r/Il12b/Ifng/Il5ra/Il2rg/Stat1/Il2ra/Il4ra/Ccnd1/Osmr/Il21r/Socs3/Il10ra/Ccnd2/Myc/Jak3/Csf2rb2/Il13ra2
Cell Cycle	121	-0.525539	-2.17251	1.1e-08	2.27e-07	Skp1/Cdc25b/Anapc1/Ywhab/Ywhah/Ep300/Cdkn1c/E2f3/Espl1/Ywhaz/Bub3/Crebbp/E2f1/Gadd45b/Cdk1/Stag2/Orc2/Ywhae/Chek2/Ccnb2/Cdc27/Tgfb1/E2f4/Hdac2/Ywhag/Cdc14b/Smc1a/Mcm3/Pcna/Orc1/Smad2/Cdc45/Cdk4/Smad3/Ccnh/Ttk/Trp53/Cdc20/Ccna2/Smc3/Mcm5/Bub1b/Mcm6/Cdc6/Mcm2/E2f2/Mad1l1/Gadd45g/Atr/Tfdp1/Ccnb1/Mad2l1/Mcm7/Orc6/Ccne2/Cdc25c/Stag1/Smad4/Bub1/Dbf4/Cdc7/Ccnd1/Skp2/Mcm4/Ccnd2/Ccne1/Myc/Chek1
Dna Replication	35	-0.645464	-2.14595	3.05e-05	0.000256238	Rfc4/Pole4/Ssbp1/Rnaseh2b/Pold4/Pold3/Pold2/Pole2/Rfc5/Rfc1/Rpa3/Pold1/Prim1/Pole3/Mcm3/Pcna/Rpa1/Rfc3/Lig1/Mcm5/Mcm6/Fen1/Prim2/Mcm2/Rpa2/Mcm7/Pola1/Mcm4/Dna2
Asthma	24	-0.702937	-2.12182	5.16e-05	0.000366878	H2-DMa/Ms4a2/H2-Eb1/Fcer1a/H2-Ab1/Ear2/H2-Aa/Il10/Ccl11/Fcer1g/H2-DMb1/H2-DMb2/Tnf/H2-Oa/Cd40/H2-Ob
Cell Adhesion Molecules Cams	121	-0.507773	-2.09907	7.19e-08	1.02e-06	Vcan/Cdh5/H2-DMa/Itgav/Esam/H2-Eb1/Cd2/Itga6/Icosl/Cd274/H2-Ab1/Cldn14/Icos/Selplg/Itgb8/Itgb7/H2-Q7/Siglec1/Cd80/Pecam1/Pdcd1/Pdcd1lg2/Itga4/H2-Aa/Cldn20/Ptprc/Nfasc/Itgal/Icam1/Cd4/H2-DMb1/H2-M2/Cd86/Sele/H2-DMb2/Selp/Itgam/Madcam1/H2-Oa/Sell/Cd40/Itgb2/Cd22/H2-Ob/Ctla4/Vcam1/Cldn1
Allograft Rejection	34	-0.62945	-2.08589	3.23e-05	0.000259896	H2-M3/H2-DMa/H2-Eb1/H2-Ab1/H2-Q7/Cd80/H2-Aa/Il10/Il12b/Ifng/H2-DMb1/H2-M2/Cd86/H2-DMb2/Tnf/H2-Oa/Cd40/H2-Ob
Graft Versus Host Disease	32	-0.623708	-2.02684	0.000146978	0.000906362	H2-M3/H2-DMa/H2-Eb1/H2-Ab1/Il6/H2-Q7/Cd80/Il1a/H2-Aa/Il1b/Ifng/H2-DMb1/H2-M2/Cd86/H2-DMb2/Tnf/H2-Oa/H2-Ob
Systemic Lupus Erythematosus	100	-0.490931	-1.97266	4.28e-06	4.17e-05	Cd80/Snrpd1/H2-Aa/C6/Il10/C1qb/C1qa/Ifng/C1qc/H2-DMb1/Cd86/H2-DMb2/C4b/Tnf/H2-Oa/Fcgr1/Cd40/Fcgr3/C7/H2-Ob/C3/Fcgr4/Fcgr2b
Chemokine Signaling Pathway	173	-0.447202	-1.96935	1.33e-07	1.63e-06	Cxcl11/Rasgrp2/Gng10/Cxcl10/Vav1/Stat3/Cxcr1/Ccl4/Nras/Ccl3/Prex1/Ccl2/Cxcl12/Cxcl9/Cxcr2/Was/Cxcl2/Cxcl1/Ccl21a/Arrb2/Prkcb/Fgr/Pik3cd/Cxcl3/Adcy4/Ccl7/Cxcl16/Cxcl5/Cxcr4/Cxcl13/Stat1/Ccl11/Lyn/Ccr1/Cxcr5/Ccr7/Ncf1/Ccl12/Jak3/Ccl17/Gngt1/Ccr6/Ccr2/Ccl19
Toll Like Receptor Signaling Pathway	87	-0.505289	-1.96755	8.42e-06	7.78e-05	Nfkbia/Casp8/Tlr7/Akt2/Mapk14/Nfkb1/Irak1/Mapk8/Map3k8/Tlr6/Ifnar2/Tirap/Irak4/Tlr4/Spp1/Cxcl11/Il6/Myd88/Cxcl10/Cd80/Ccl4/Ccl3/Il1b/Ctsk/Cxcl9/Irf5/Pik3cd/Il12b/Stat1/Tlr8/Tlr9/Cd86/Tnf/Lbp/Ticam2/Cd40/Cd14
Rna Degradation	56	-0.540243	-1.96431	4.47e-05	0.000330734	Eno1/Cnot3/Ttc37/C1d/Cnot9/Cnot7/Zcchc7/Ddx6/Lsm4/Lsm3/Papolg/Edc3/Dcps/Lsm7/Patl1/Exosc7/Exosc9/Exosc10/Edc4/Exosc3/Cnot2/Dcp2/Lsm8/Papola/Lsm6/Hspa9/Exosc2/Mtrex/Lsm5/Pnpt1/Exosc8/Xrn2/Exosc1/Lsm2/Cnot4/Cnot6/Dis3/Hspd1
Aminoacyl Trna Biosynthesis	41	-0.561787	-1.94754	0.000339009	0.00179191	Yars/Vars2/Aars/Lars/Tars/Hars/Ears2/Cars2/Kars/Nars2/Tarsl2/Tars2/Mars2/Dars/Mars1/Farsb/Rars/Yars2/Farsa/Wars/Eprs/Nars/Iars/Vars
Type I Diabetes Mellitus	40	-0.560727	-1.93801	0.000325085	0.00176884	H2-Q7/Cd80/Il1a/H2-Aa/Il1b/Il12b/Ifng/Lta/H2-DMb1/H2-M2/Cd86/H2-DMb2/Hspd1/Tnf/H2-Oa/H2-Ob
Homologous Recombination	27	-0.615028	-1.92473	0.000577353	0.00296695	Ssbp1/Top3a/Rad51c/Pold4/Pold3/Pold2/Eme1/Rpa3/Pold1/Rpa1/Rad50/Rad51/Xrcc2/Brca2/Rad54b/Rad54l/Blm/Nbn/Mre11a/Rpa2
Small Cell Lung Cancer	83	-0.483608	-1.87707	4.21e-05	0.000324551	Pik3cg/Traf6/E2f3/Rela/E2f1/Lama5/Nfkbia/Akt2/Lama2/Nfkb1/Fhit/Itga3/Cks1b/Itgav/Cdk4/Birc2/Lamb1/Itga6/Trp53/Pten/Lamc1/Fn1/Ptgs2/E2f2/Apaf1/Lamc2/Lama1/Ccne2/Col4a2/Pik3cd/Col4a1/Nos2/Ccnd1/Skp2/Ccne1/Myc
Base Excision Repair	33	-0.566774	-1.86766	0.000844647	0.0041121	Apex2/Pold4/Pold3/Pold2/Pole2/Pold1/Hmgb1/Tdg/Pole3/Pcna/Neil3/Apex1/Lig1/Lig3/Neil2/Fen1/Mbd4/Parp1/Parp3
Natural Killer Cell Mediated Cytotoxicity	106	-0.454485	-1.85187	5.61e-05	0.000384274	Lat/Lck/Pak1/Raet1d/H2-M3/Vav3/Cd247/Shc4/Csf2/Klrk1/Tnfrsf10b/Ncr1/A530064D06Rik/Ifnar2/Plcg2/Raet1e/H2-Q7/Vav1/Rac3/Nras/Cd244a/Syk/Prkcb/Pik3cd/Sh3bp2/Itgal/Ifng/Tnfsf10/Cd48/Icam1/Fcer1g/H2-M2/Lcp2/Ulbp1/Tnf/Tyrobp/Itgb2/Fcgr4
Mismatch Repair	22	-0.623351	-1.84346	0.00181219	0.00761943	Rfc4/Ssbp1/Mlh1/Pold4/Pold3/Pold2/Pms2/Rfc5/Rfc1/Msh2/Rpa3/Pold1/Pcna/Rpa1/Rfc3/Lig1/Msh6/Rpa2/Exo1
Nucleotide Excision Repair	43	-0.521893	-1.82047	0.00180947	0.00761943	Pole/Cdk7/Ddb1/Rad23a/Ercc3/Ercc4/Ercc5/Rfc4/Pole4/Pold4/Pold3/Pold2/Pole2/Gtf2h1/Cetn2/Rfc5/Rad23b/Gtf2h2/Ercc6/Rfc1/Rpa3/Pold1/Gtf2h3/Pole3/Pcna/Rpa1/Rfc3/Ercc8/Lig1/Ccnh/Gtf2h4/Cul4b/Rpa2
Autoimmune Thyroid Disease	35	-0.546755	-1.81777	0.00237388	0.00954713	H2-Q7/Cd80/H2-Aa/Il10/H2-DMb1/H2-M2/Cd86/H2-DMb2/H2-Oa/Cd40/H2-Ob/Ctla4
Leukocyte Transendothelial Migration	107	-0.430202	-1.75696	0.000173799	0.00103719	Cldn10/Mapk14/Arhgap35/Actb/Rock1/Vav3/Cdh5/Esam/Cyba/Myl7/Cldn14/Rock2/Plcg2/Mmp2/Ncf4/Mmp9/Pecam1/Vav1/Msn/Nox1/Itga4/Cldn20/Cxcl12/Rassf5/Prkcb/Pik3cd/Rhoh/Itgal/Cxcr4/Icam1/Ncf2/Itgam/Ncf1/Cybb/Itgb2/Vcam1/Cldn1
T Cell Receptor Signaling Pathway	108	-0.424473	-1.73322	0.00059445	0.00297225	Ppp3ca/Pik3r5/Akt1/Mapk1/Cblb/Cbl/Mapk11/Ppp3cc/Grap2/Pak5/Pik3ca/Ikbkb/Map3k7/Pik3cg/Tec/Ptpn6/Dlg1/Rela/Nfatc4/Nfkbia/Lat/Lck/Pak1/Akt2/Mapk14/Nfkb1/Vav3/Cd247/Malt1/Csf2/Cdk4/Map3k8/Card11/Icos/Pdcd1/Vav1/Nras/Il10/Map3k14/Ptprc/Pak6/Pik3cd/Ifng/Rasgrp1/Cd4/Nfkbie/Lcp2/Tnf/Ctla4
Acute Myeloid Leukemia	57	-0.470265	-1.72023	0.00215487	0.0088589	Eif4ebp1/Tcf7/Runx1/Stat3/Pim1/Lef1/Nras/Pik3cd/Flt3/Ccnd1/Spi1/Myc/Zbtb16
Pathways In Cancer	322	-0.309308	-1.45508	0.00118565	0.00528505	Msh2/Tpr/Lama5/Nfkbia/Appl1/Casp8/Ntrk1/Wnt5a/Akt2/Lama2/Nfkb1/Tgfb1/Hdac2/Wnt9b/Pax8/Mapk8/Smad2/Itga3/Fgf7/Cks1b/Itgav/Cdk4/Smad3/Cul2/Birc2/Lamb1/Tpm3/Itga6/Fgf10/Trp53/Pten/Tgfbr2/Rad51/Lamc1/Mitf/Fgf18/Fgf2/Met/Csf2ra/Fn1/Birc5/Ptgs2/Tgfbr1/Plcg2/Mmp2/Brca2/Fzd1/E2f2/Pgf/Pdgfra/Lamc2/Msh6/Tcf7/Lama1/Il6/Pdgfrb/Mmp9/Runx1/Dapk2/Stat3/Ets1/Rac3/Ccne2/Hgf/Lef1/Col4a2/Nras/Igf1/Smad4/Hif1a/Rassf…
Huntingtons Disease	168	0.35998	1.61563	0.000185904	0.00107476	Cox7a1/Bbc3/Ndufa1/Casp3/Vdac3/Ndufv3/Cox6b2/Cox6a1/Creb3l4/Ndufb9/Cox4i1/Hap1/Creb3l1/mt-Co1/Pparg/Uqcr11/Uqcrh/Cox6c/mt-Co3/Atp5e/Cox4i2/Ndufb2/Ndufb4/Ndufa3/Uqcr10/Ndufb8/Cox8a/Slc25a4/Dnali1/Atp5h/Ndufa2/Cox6b1/Ppargc1a/Sdhb/Cox5b/Dnah2/Ndufs6/Uqcrq/Ndufa7/Ndufb1/Grin1/Ndufa4/mt-Atp6/Cox7c/Ndufa6/Ndufb10/Cox7a2/Itpr1/mt-Atp8/Ndufv2/Uqcrfs1/mt-Co2/Cox5a/Atp5o/Sod1/Ndufs7/Ndufc1/Cox7b/Ndufs8/Nd…
Ppar Signaling Pathway	63	0.452593	1.71737	0.000966147	0.00458301	Fabp6/Scd1/Fabp2/Plin1/Aqp7/Pck1/Adipoq/Acsl1/Ehhadh/Ppara/Acsl3/Slc27a6/Lpl/Slc27a5/Acsl6/Ppard/Me1/Pparg/Scd2/Slc27a4/Fabp3/Ilk/Apoa5/Ubc/Slc27a1/Scp2/Acaa1a/Acadm/Hmgcs2/Dbi/Sorbs1/Acox3/Apoa1
Hedgehog Signaling PathwayHedgehog (Hh)	47	0.497869	1.79377	0.00119985	0.00528505	Gas1/Shh/Lrp2/Wnt10b/Wnt2/Bmp6/Hhip/Gli1/Ihh/Btrc/Bmp8a/Wnt9a/Ptch2/Wnt2b/Fbxw11/Gli2/Ptch1
Neuroactive Ligand Receptor Interaction	223	0.384653	1.80068	1.19e-06	1.29e-05	Hcrtr1/Grid1/Tacr3/P2rx6/Nmbr/Adrb3/Lep/Npy4r/Galr2/Lpar3/Mc4r/Gpr156/Tshr/Sstr4/Gabrq/Ntsr1/Chrm1/Grpr/Oprd1/Ptger4/Grid2/Ptger3/Tshb/Hrh1/Sstr2/Chrna3/Adcyap1r1/Adra2c/Chrm3/Mc2r/Sstr1/Tbxa2r/P2rx4/P2ry1/Thra/Adrb1/Chrna6/Gabrb2/Galr1/Grin2a/Chrna1/Glrb/Gabbr1/Htr2b/Cnr1/Agtr2/Chrnb4/Lhb/F2/Oxtr/Oprl1/Npy2r/Glp2r/Mas1/Adra1a/Grin2c/Chrna5/Drd4/Grik5/Adra2b/Oprk1/Gabrd/P2rx2/Chrnb2/Ghrhr/Vipr2/C…
Retinol Metabolism	40	0.532612	1.83924	0.00102115	0.00472281	Cyp2c55/Ugt1a6b/Ugt1a7c/Ugt1a2/Lrat/Ugt2b35/Cyp3a11/Ugt2b36/Ugt1a1/Retsat/Cyp3a25/Adh5/Ugt2b34/Cyp2c65/Cyp1a1/Aldh1a1/Adh6a/Awat2/Rdh5
Metabolism Of Xenobiotics By Cytochrome P450	51	0.522116	1.92653	0.000191963	0.00107616	Cyp2c55/Ugt1a6b/Cyp2s1/Ugt1a7c/Gstk1/Ugt1a2/Ephx1/Ugt2b35/Mgst3/Cyp3a11/Ugt2b36/Gstm7/Ugt1a1/Cyp3a25/Adh5/Ugt2b34/Gstm5/Cyp2c65/Gstm1/Cyp1a1/Gstz1/Adh6a/Gstm2/Gstm4
Cardiac Muscle Contraction	71	0.506777	1.98213	1.95e-05	0.000172081	Cox7a1/Tpm2/Tpm1/Cacng8/Cacnb1/Cacnb2/Cacng4/Actc1/Cox6b2/Cox6a1/Cacnb3/Cox4i1/Slc8a1/mt-Co1/Uqcr11/Uqcrh/Cox6c/mt-Co3/Cox4i2/Uqcr10/Cox8a/Atp1a2/Cox6b1/Cox5b/Uqcrq/Cox7c/Cox7a2/Uqcrfs1/mt-Co2/Cox5a/Myh7/Cox7b/Slc9a1/Cyc1/Slc9a6/Cacna2d3
Drug Metabolism Cytochrome P450	52	0.538888	1.99233	6.5e-05	0.000429599	Cyp2c55/Ugt1a6b/Ugt1a7c/Gstk1/Fmo5/Ugt1a2/Ugt2b35/Mgst3/Cyp3a11/Ugt2b36/Maoa/Gstm7/Ugt1a1/Cyp3a25/Adh5/Ugt2b34/Gstm5/Cyp2c65/Gstm1/Maob/Gstz1/Adh6a/Gstm2/Gstm4/Fmo4
Alzheimers Disease	157	0.450177	2.01357	8e-08	1.06e-06	Cox7a1/Bace2/Chp2/Snca/Ndufa1/Itpr2/Casp3/Grin2a/Ndufv3/Cox6b2/Cox6a1/Ndufb9/Lpl/Cox4i1/mt-Co1/Uqcr11/Uqcrh/Cox6c/mt-Co3/Grin2c/Atp5e/Cox4i2/Ndufb2/Ndufb4/Ndufa3/Uqcr10/Apbb1/Ndufb8/Cox8a/Atp2a3/Atp5h/Ndufa2/Cox6b1/Sdhb/Cox5b/Ndufs6/Uqcrq/Ndufa7/Ndufb1/Grin1/Ndufa4/mt-Atp6/Cox7c/Cdk5/Ndufa6/Bad/Ndufb10/Cox7a2/Itpr1/mt-Atp8/Ryr3/Ndufv2/Uqcrfs1/mt-Co2/Nos1/Cox5a/Atp5o/Ndufs7/Ndufc1/Cox7b/Ndufs8/Ndu…
Ascorbate And Aldarate Metabolism	16	0.744083	2.05717	8.1e-05	0.000517004	Ugt1a6b/Ugt1a7c/Ugdh/Ugt1a2/Ugt2b35/Ugt2b36/Ugt1a1/Ugt2b34/Aldh2
Parkinsons Disease	121	0.528419	2.27565	4.4e-10	1.36e-08	Cox7a1/Gpr37/Snca/Ndufa1/Casp3/Vdac3/Ndufv3/Cox6b2/Cox6a1/Ndufb9/Cox4i1/mt-Co1/Uqcr11/Uqcrh/Cox6c/mt-Co3/Atp5e/Cox4i2/Ndufb2/Ndufb4/Ndufa3/Uqcr10/Ndufb8/Cox8a/Slc25a4/Atp5h/Ndufa2/Cox6b1/Sdhb/Cox5b/Ndufs6/Uqcrq/Ndufa7/Ndufb1/Ndufa4/mt-Atp6/Cox7c/Pink1/Ndufa6/Ndufb10/Slc18a2/mt-Nd1/Cox7a2/Th/mt-Atp8/Ndufv2/Uqcrfs1/mt-Co2/Cox5a/Atp5o/Slc18a1/Ndufs7/Ndufc1/Cox7b/Ndufs8/Ndufb5/Ndufb7/Atp5g1/Ubb/Ndufc…
Oxidative Phosphorylation	123	0.547095	2.36441	1e-10	3.7e-09	Cox7a1/Ndufa1/Ndufv3/Cox6b2/Cox6a1/Ndufb9/Cox4i1/Atp5j2/mt-Co1/Atp6v0e2/Uqcr11/Ndufa11/Uqcrh/Cox6c/mt-Co3/Atp5e/Cox4i2/Ndufb2/Ndufb4/Ndufa3/Uqcr10/Ndufb8/Cox8a/Atp5h/Ndufa2/Atp6v1e1/Cox6b1/Sdhb/Cox5b/Ndufs6/Uqcrq/Ndufa7/Ndufb1/Ndufa4/mt-Atp6/Cox7c/Atp5l/Ndufa6/Ndufb10/mt-Nd1/Cox7a2/mt-Atp8/Atp6v1f/Ndufv2/Uqcrfs1/mt-Co2/Cox5a/Atp5o/Atp4a/Ndufs7/Ndufc1/Atp5k/Cox7b/Atp6v0b/Ndufs8/Ppa2/Atp6v0d1/Ndufb…
